# Supplementary material
Source: Springer Nature journal article supplement (https://www.springermedizin.de/resource/supplementary/12916_2009_257_MOESM1_ESM.pdf/9599504)

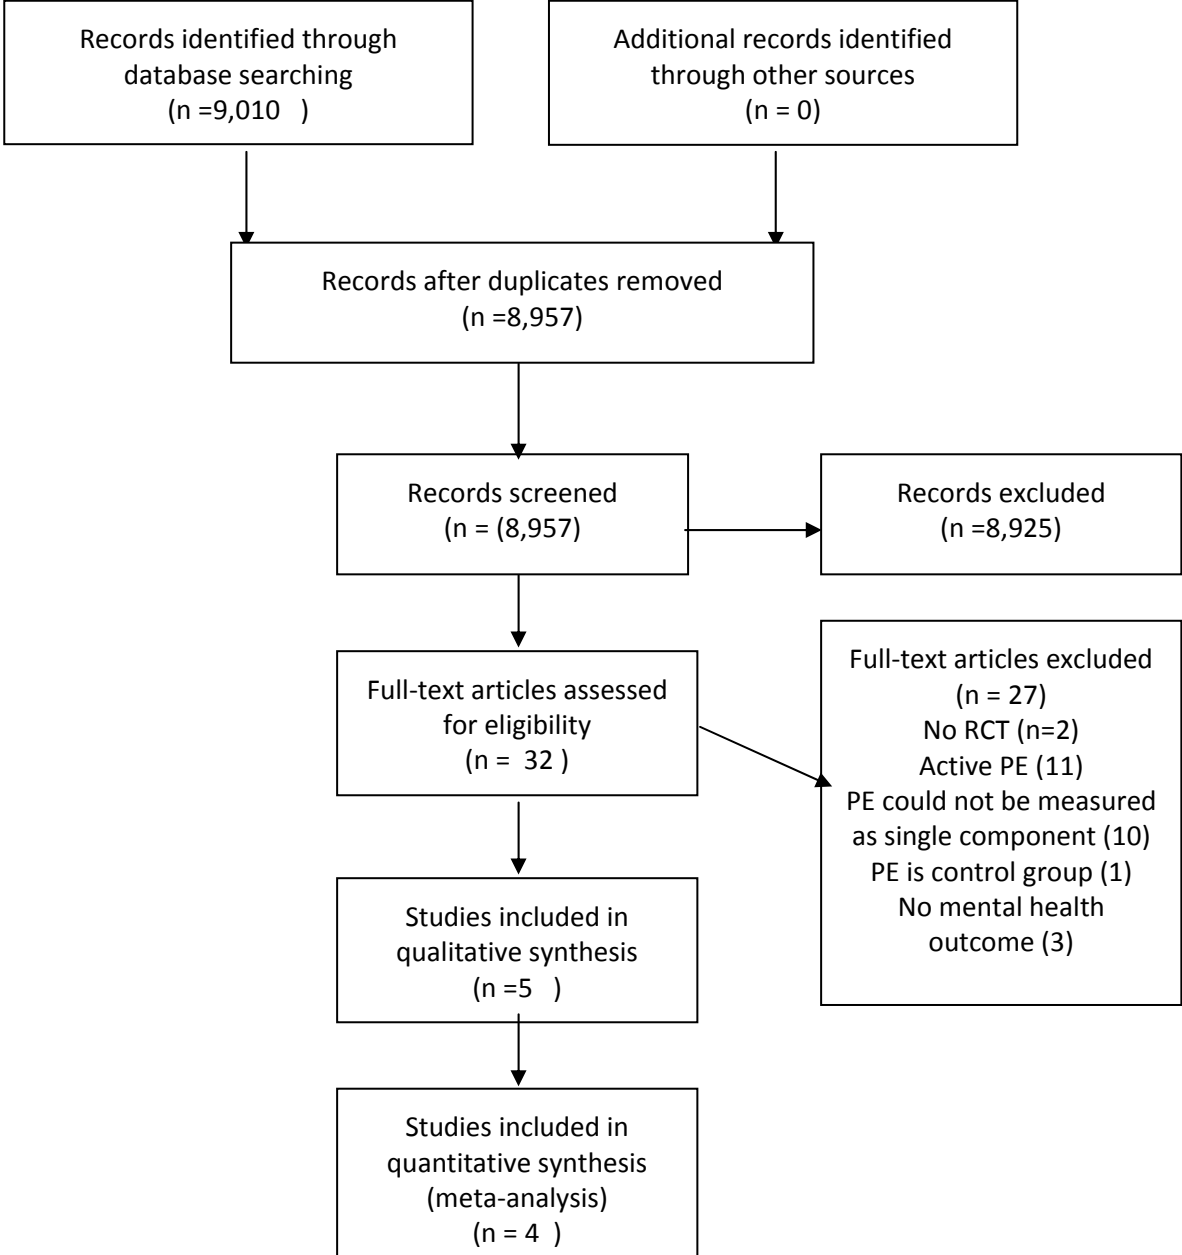

Supplement: MOESM1 [file 9599504]
